# Supplementary material for: Vaccination and the Risk of Childhood Cancer—A Systematic Review and Meta-Analysis
Source: Frontiers journal article supplement (doi:10.3389/fonc.2020.610843), 2021-01-22
Supplement: Data_Sheet_6.PDF [file Data_Sheet_6.PDF]

Supplementary Figure 3A. Publication bias: BCG vaccination and risk of leukemia

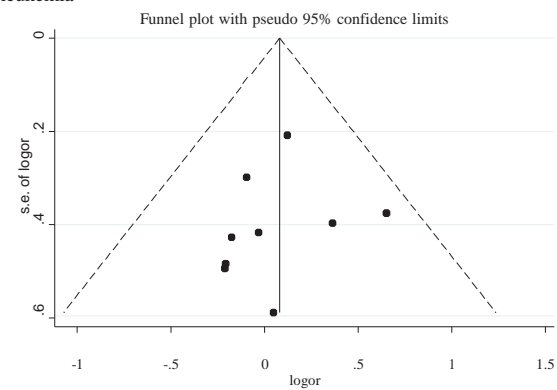

Supplementary Figure 4A. Publication bias: BCG vaccination and risk of cancer

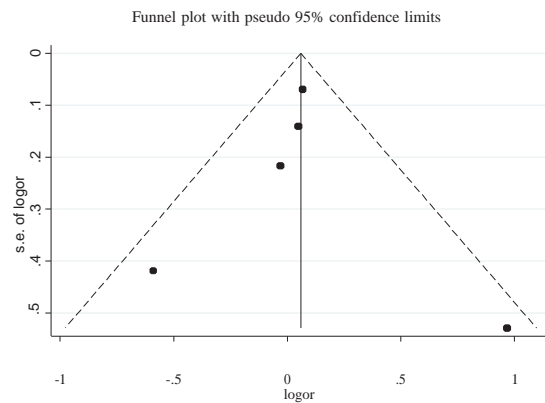

Supplementary Figure 3B. Publication bias: BCG vaccination and risk of leukemia

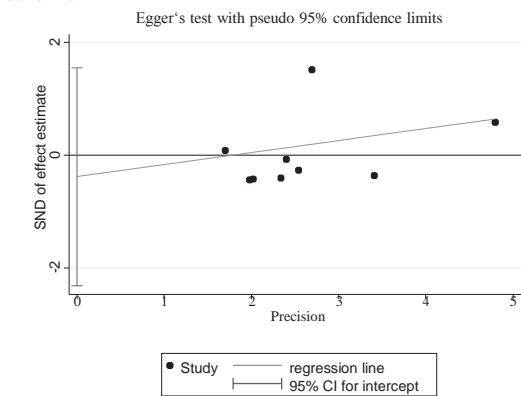

Supplementary Figure 4B. Publication bias: BCG vaccination and risk of cancer

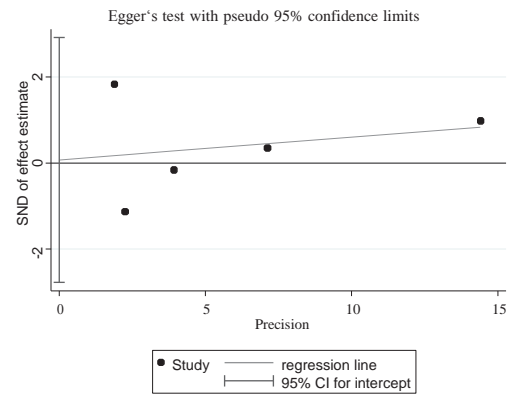

Supplementary Figure 3C. Publication bias: BCG vaccination and risk of leukemia

|                                                |           |           |       |       |                      |          |
|------------------------------------------------|-----------|-----------|-------|-------|----------------------|----------|
| Egger's test with pseudo 95% confidence limits |           |           |       |       |                      |          |
| Number of studies = 9                          |           |           |       |       |                      |          |
| Root MSE = .7813                               |           |           |       |       |                      |          |
| Std Eff                                        | Coef.     | Std. Err. | t     | P> t  | [95% Conf. Interval] |          |
| slope                                          | .2138512  | .2929403  | 0.73  | 0.489 | -.4788424            | .9065449 |
| bias                                           | -.3865152 | .8180817  | -0.47 | 0.651 | -2.320971            | 1.547941 |
| Test of H0: no small-study effects P = 0.651   |           |           |       |       |                      |          |

Supplementary Figure 4C. Publication bias: BCG vaccination and risk of cancer

|                                                |          |           |      |       |                      |          |
|------------------------------------------------|----------|-----------|------|-------|----------------------|----------|
| Egger's test with pseudo 95% confidence limits |          |           |      |       |                      |          |
| Number of studies = 5                          |          |           |      |       |                      |          |
| Root MSE = 1.235                               |          |           |      |       |                      |          |
| Std Eff                                        | Coef.    | Std. Err. | t    | P> t  | [95% Conf. Interval] |          |
| slope                                          | .0530243 | .1190101  | 0.45 | 0.686 | -.3257189            | .4317675 |
| bias                                           | .0684937 | .8942422  | 0.08 | 0.944 | -2.777384            | 2.914371 |
| Test of H0: no small-study effects P = 0.944   |          |           |      |       |                      |          |

Supplementary Figure 3A-C. Publication bias: BCG vaccination and risk of leukemia.  
Abbreviations: BCG, Bacillus Calmette–Guérin (vole bacillus; tuberculosis); CI, confidence interval; Coef, coefficient; Conf, confidence; Eff, effect; Err, error; logor, log odds ratio; MSE, mean square error; P, P-value; se, standard error; SND, standard normal deviate; Std, standard.

Supplementary Figure 4A-C. Publication bias: BCG vaccination and risk of cancer.  
Abbreviations: BCG, Bacillus Calmette–Guérin (vole bacillus; tuberculosis); CI, confidence interval; Coef, coefficient; Conf, confidence; Eff, effect; Err, error; logor, log odds ratio; MSE, mean square error; P, P-value; se, standard error; SND, standard normal deviate; Std, standard.

**Supplementary Figure 5A.** Publication bias: Polio vaccination and risk of leukemia

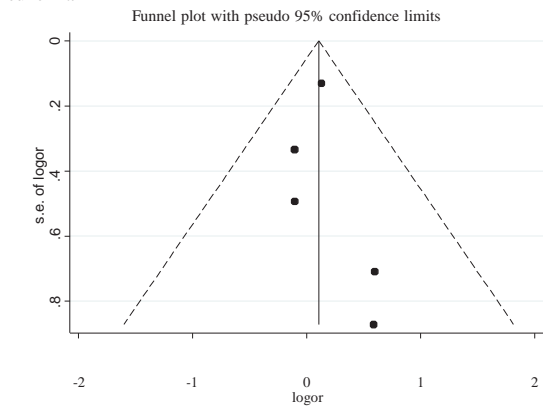

**Supplementary Figure 5B.** Publication bias: Polio vaccination and risk of leukemia

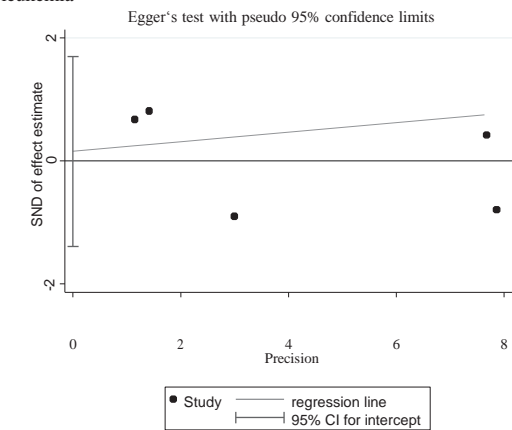

**Supplementary Figure 5C.** Publication bias: Polio vaccination and risk of leukemia

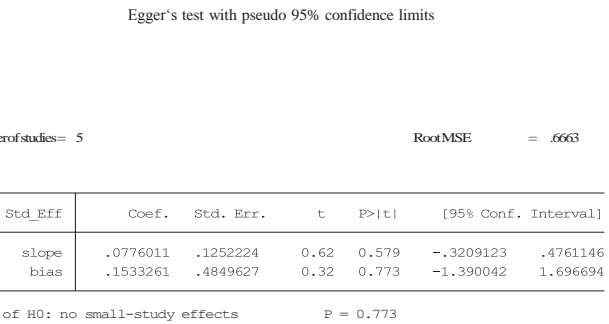

**Supplementary Figure 5A-C.** Publication bias: Polio vaccination and risk of leukemia.  
Abbreviations: CI, confidence interval; Coef, coefficient; Conf, confidence; Eff, effect; Err, error; logor, log odds ratio; MSE, mean square error; P, P-value; Polio, poliomyelitis; se, standard error; SND, standard normal deviate; Std, standard.

**Supplementary Figure 6A.** Publication bias: Hib vaccination and risk of ALL

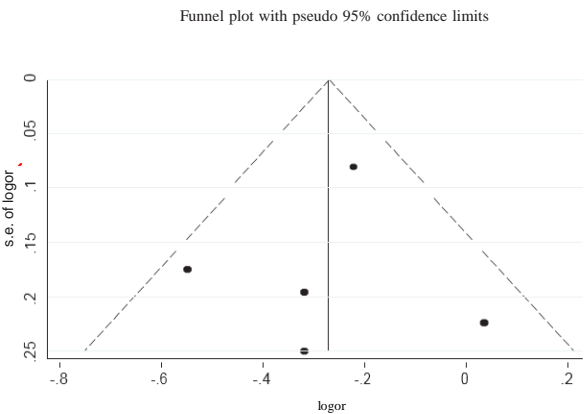

**Supplementary Figure 6B.** Publication bias: Hib vaccination and risk of ALL

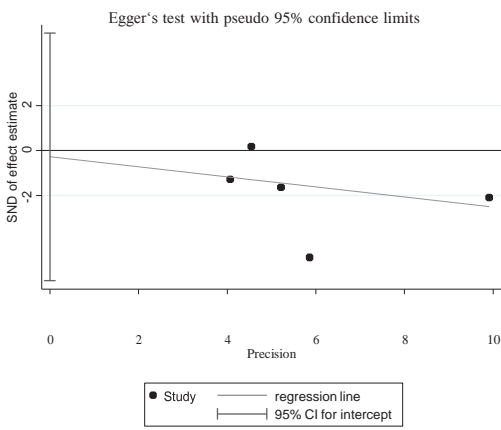

**Supplementary Figure 6C.** Publication bias: Hib vaccination and risk of ALL

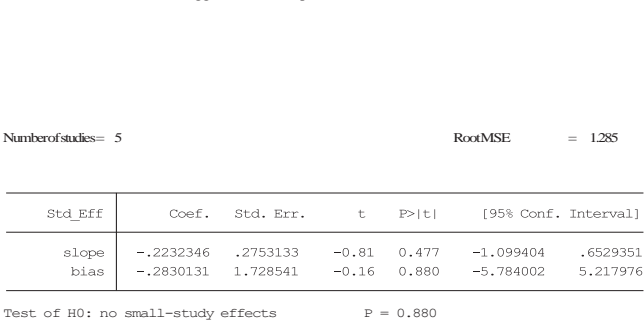

**Supplementary Figure 6A-C.** Publication bias: Hib vaccination and risk of ALL.  
Abbreviations: ALL, Acute lymphoblastic leukemia; CI, confidence interval; Coef, coefficient; Conf, confidence; Eff, effect; Err, error; Hib, Haemophilus influenzae type b; logor, log odds ratio; MSE, mean square error; P, P-value; se, standard error; SND, standard normal deviate; Std, standard.

**Supplementary Figure 7A.** Publication bias: MMR vaccination and risk of ALL  
Funnel plot with pseudo 95% confidence limits

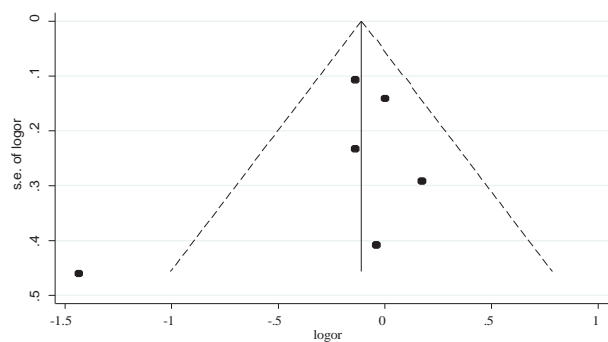

**Supplementary Figure 8A.** Publication bias: Number of vaccinations and risk of ALL

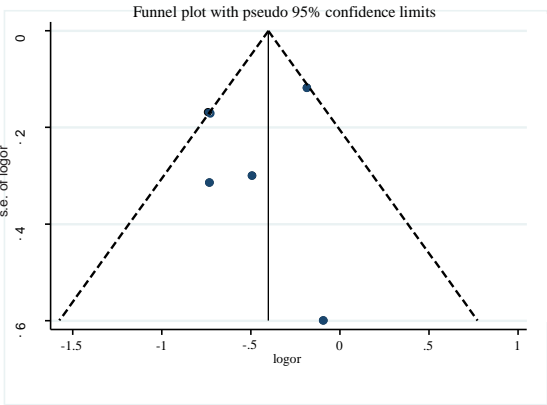

**Supplementary Figure 7B.** Publication bias: MMR vaccination and risk of ALL  
Egger's test with pseudo 95% confidence limits

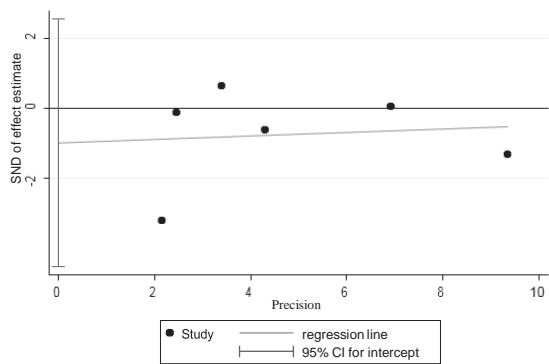

**Supplementary Figure 8B.** Publication bias: Number of vaccinations and risk of ALL  
Egger's test with pseudo 95% confidence limits

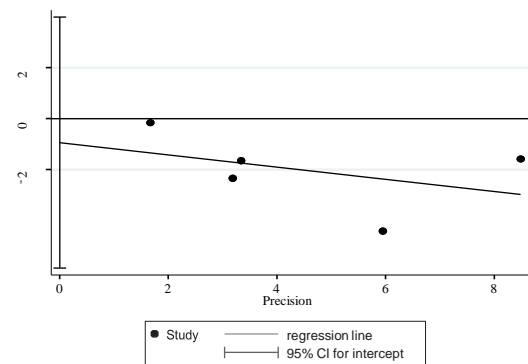

**Supplementary Figure 7C.** Publication bias: MMR vaccination and risk of ALL  
Egger's test with pseudo 95% confidence limits

| Numberofstudies= 6 |           |           |       | RootMSE = 1.48 |                      |          |
|--------------------|-----------|-----------|-------|----------------|----------------------|----------|
| Std Eff            | Coef.     | Std. Err. | t     | P> t           | [95% Conf. Interval] |          |
| slope              | .0498346  | .2352268  | 0.21  | 0.843          | -.6032597            | .7029289 |
| bias               | -.9804296 | 1.274464  | -0.77 | 0.485          | -4.518909            | 2.55805  |

Test of H0: no small-study effects P = 0.485

**Supplementary Figure 8C.** Publication bias: Number of vaccinations and risk of ALL  
Egger's test with pseudo 95% confidence limits

| Numberofstudies= 5 |           |           | RootMSE |       | = 1.627              |          |
|--------------------|-----------|-----------|---------|-------|----------------------|----------|
| Std Eff            | Coef.     | Std. Err. | t       | P> t  | [95% Conf. Interval] |          |
| slope              | -.2406651 | .3017854  | -0.80   | 0.483 | -1.201081            | .7197509 |
| bias               | -.9387165 | 1.547196  | -0.61   | 0.587 | -5.862586            | 3.985153 |

Test of H0: no small-study effects P = 0.587

**Supplementary Figure 7A-C.** Publication bias: MMR vaccination and risk of ALL.

Abbreviations: ALL, Acute lymphoblastic leukemia; CI, confidence interval; Coef, coefficient; Conf, confidence; Eff, effect; Err, error; logor, log odds ratio; MMR, Mumps-Measles-Rubella; MSE, mean square error; P, P-value; se, standard error; SND, standard normal deviate; Std, standard.

**Supplementary Figure 8A-C.** Publication bias: Number of vaccinations and risk of ALL.

Abbreviations: ALL, Acute lymphoblastic leukemia; CI, confidence interval; Coef, coefficient; Conf, confidence; Eff, effect; Err, error; logor, log odds ratio; MSE, mean square error; P, P-value; se, standard error; SND, standard normal deviate; Std, standard.
